# Supplementary material
Source: MDPI journal article supplement (https://www.mdpi.com/2073-445X/11/3/350)
Supplement: s1 [file s1]

Archive with 2 entries (2 files):
- Table S1. Rationale for neighborhood selection. This table shows the data and logic be-hind choosing Census Tract 377 in the North Central neighborhood, as our study area.pdf
- Table S2. Suitability matrix.pdf
