# Supplementary material
Source: MDPI journal article supplement (https://www.mdpi.com/2073-445X/11/3/350)
Supplement: s1 [file s1]

|                                 | Census Tract 377                      | Census Tract 140 | Census Tract 144 | Census Tract 145 | Census Tract 146 | Census Tract 147 | Census Tract 153 | Census Tract 156 | Census Tract 162 | Census Tract 163 | Census Tract 164 | Census Tract 165 | Census Tract 166 | Census Tract 167.01 | Census Tract 167.02 |
|---------------------------------|---------------------------------------|------------------|------------------|------------------|------------------|------------------|------------------|------------------|------------------|------------------|------------------|------------------|------------------|---------------------|---------------------|
| Unique Area Identifier          | 489729                                | 489387           | 489391           | 489392           | 489393           | 489394           | 489398           | 489399           | 489464           | 489465           | 489466           | 489467           | 489468           |                     | 489634              |
| Name                            | Census Tract 377                      |                  |                  | Census Tract 145 | Census Tract 146 | Census Tract 147 | Census Tract 153 | Census Tract 156 | Census Tract 162 | Census Tract 163 | Census Tract 164 | Census Tract 165 | Census Tract 166 |                     | Census Tract 167.02 |
| Area (square miles)             | 0.28                                  | 0.17             | 0.24             | 0.12             | 0.17             | 0.13             | 0.18             | 0.17             | 0.14             | 0.22             | 0.19             | 0.15             | 0.1              | 0.22                | 0.14                |
| Land Area (square miles)        | 0.28                                  | 0.17             | 0.24             | 0.12             | 0.17             | 0.13             | 0.18             | 0.17             | 0.14             | 0.22             | 0.19             | 0.15             | 0.1              | 0.22                | 0.14                |
| Water Area (square miles)       | 0                                     | 0                | 0                | 0                | 0                | 0                | 0                | 0                | 0                | 0                | 0                | 0                | 0                | 0                   | 0                   |
| % of Land Area                  | 100                                   | 100              | 100              | 100              | 100              | 100              | 100              | 100              | 100              | 100              | 100              | 100              | 100              | 100                 | 100                 |
| % of Water Area                 | 0                                     | 0                | 0                | 0                | 0                | 0                | 0                | 0                | 0                | 0                | 0                | 0                | 0                | 0                   | 0                   |
| Latitude of the Internal Point  | 39.9824381                            | 39.9735358       | 39.9722286       | 39.9760715       | 39.9764305       | 39.9785489       | 39.9837644       | 39.9790066       | 39.9840197       | 39.9885061       | 39.9896437       | 39.989055        | 39.9890491       | 39.993926           | 39.9904175          |
| Longitude of the Internal Point | -75.1506932                           | -75.1630966      | -75.1400952      | -75.1484189      | -75.154699       | -75.1620244      | -75.1608849      | -75.141891       | -75.1384217      | -75.1339156      | -75.1431665      | -75.1491723      | -75.1536062      | -75.1343448         | -75.1578177         |
| Total Population                | 5,635                                 | 3,010            | 3,105            | 2,464            | 4,289            | 3,939            | 4,962            | 1,741            | 2,225            | 3,248            | 4,564            | 2,758            | 1,788            | 5,562               | 2,903               |
| Total Housing Units             | 1,506                                 | 1,561            | 1,561            | 713              | 1,192            | 1,170            | 1,783            | 705              | 897              | 1,224            | 1,739            | 1,218            | 729              | 2,097               | 1,423               |
| Total Households                | 1,351                                 | 1,268            | 1,307            | 659              | 1,163            | 958              | 1,434            | 607              | 769              | 1,031            | 1,485            | 989              | 586              | 1,834               | 1,119               |
| Median Age                      | 19.7                                  | 28               | 31.5             | 21.7             | 20.5             | 20.7             | 21.4             | 30.3             | 28.6             | 28.9             | 30.4             | 28.1             | 30.2             | 28.2                | 29.9                |
| Age 0-9 %                       | 9%                                    | 11%              | 10%              | 16%              | 5%               | 13%              | 1%               | 16%              | 13%              | 17%              | 11%              | 28%              | 5%               | 14%                 | 11%                 |
| Age10-19 %                      | 44%                                   | 11%              | 10%              | 18%              | 37%              | 12%              | 26%              | 13%              | 12%              | 14%              | 10%              | 11%              | 10%              | 14%                 | 9%                  |
| Under 18 %                      | 15%                                   | 20%              | 19%              | 29%              | 13%              | 21%              | 5%               | 26%              | 23%              | 29%              | 20%              | 37%              | 8%               | 25%                 | 18%                 |
| Age 0-9 number                  | 507.15                                | 331.1            | 310.5            | 394.24           | 214.45           | 512.07           | 49.62            | 278.56           | 289.25           | 552.16           | 502.04           | 772.24           | 89.4             | 778.68              | 319.33              |
| Age 10-19 number                | 2479.4                                | 331.1            | 310.5            | 443.52           | 1586.93          | 472.68           | 1290.12          | 226.33           | 267              | 454.72           | 456.4            | 303.38           | 178.8            | 778.68              | 261.27              |
| SQF total census tract area     | 7805952                               | 4739328          | 6690816          | 3345408          | 4739328          | 3624192          | 5018112          | 4739328          | 3902976          | 6133248          | 5296896          | 4181760          | 2787840          | 6133248             | 3902976             |
| SQF within 500 meter boundary   | 7931530.807                           | 5440.150236      | 453057.2816      | 2667854.148      | 3226110.609      | 2104825.781      | 3677362.429      | 4339421.703      | 2011483.908      | 113747.4222      | 1880167.209      | 2672406.757      | 2063459.759      | 179172.7641         | 1929286.133         |
| Percentage of selected area     | selected area/entire census area      | 1                | 0                | 0.1              | 0.8              | 0.7              | 0.6              | 0.7              | 0.9              | 0.5              | 0                | 0.4              | 0.6              | 0.7                 | 0.5                 |
| Age 0-9 within area             | percentage of selected area*age 0-9   | 515              | 0                | 21               | 314              | 146              | 297              | 36               | 255              | 149              | 10               | 178              | 494              | 66                  | 158                 |
| Age 10-19 within area           | percentage of selected area*age 10-19 | 2519             | 0                | 21               | 354              | 1080             | 275              | 945              | 207              | 138              | 8                | 162              | 194              | 132                 | 129                 |
