# Supplementary material
Source: MDPI journal article supplement (https://www.mdpi.com/2073-445X/11/3/350)
Supplement: s1 [file s1 › Table S2. Suitability matrix.pdf]

## Street Suitability Matrix Table

|                        | Data Description                                                                                                                                                                                             | Measurement             | 0-Not suitable | 1-Minimally Suitable               | 2-Satisfactory                            | 3- Excellent                                             |
|------------------------|--------------------------------------------------------------------------------------------------------------------------------------------------------------------------------------------------------------|-------------------------|----------------|------------------------------------|-------------------------------------------|----------------------------------------------------------|
| <b>crime incidents</b> | The crime incidents that falls within the street buffer are counted and added to the total cases.                                                                                                            | number of cases         | >300 cases     | 121-300 cases                      | 61-120 cases                              | <60 cases                                                |
| <b>street type</b>     | Complete streets data identifies the street type and associated pedestrian, bicycle, and other travel priorities associated with speed limits and sidewalk conditions.                                       | street type             | avenue         | minor arterial (speed limit 30MPH) | collector residential (speed limit 25MPH) | local residential; walkway connector (speed limit 25MPH) |
| <b>tree canopy</b>     | Urban Tree Canopy (UTC) data represents adequate tree canopy that provides shade and implies the locations of exisiting natural resources -- trees.<br>* Buffered street areas are 10 meters from centerline | distance to tree canopy | > 5 meters     | 2-5 meters                         | < 2 meters                                | 0 (under tree canopy)                                    |

## Block Suitability Matrix Table

|                                    | Data Source & Description                                                                                                                                                                                       | Measurement                             | 0-Not Suitable  | 1-Minimally Suitable | 2-Satisfactory | 3- Excellent          |
|------------------------------------|-----------------------------------------------------------------------------------------------------------------------------------------------------------------------------------------------------------------|-----------------------------------------|-----------------|----------------------|----------------|-----------------------|
| <b>crime incidents in grid</b>     | The crime incident layer is processed from the point crime data retrieved from Philadelphia Poilice Department from 2006 January to 2020 April. The crime cases are added to its grid (2,500 sqm) respectively. | number of crime incidents within a grid | > 17 cases      | 6-17 cases           | 1-6 cases      | 0 (no crime history)  |
| <b>tree canopy</b>                 | Distance to tree canopy implies the locations of existing natural resources -- trees.                                                                                                                           | distance to tree canopy                 | > 5 meters      | 2-5 meters           | < 2 meters     | 0 (under tree canopy) |
| <b>impervious surface</b>          | The pervious surfaces allow water to percolate into the soil, thus are more suitable for nature play.                                                                                                           | type of pavement                        | impervious      | not applicable       | not applicable | pervious              |
| <b>residential house occupancy</b> | Occupied residential house around the playscape can be beneficial due to the short distance from home to the play scape. The occupied house also provide social surveillance for children play nearby.          | distance to occupied house              | occupied house  | > 10 meters          | 5 - 10 meters  | < 5 meters            |
| <b>fully vacant houses</b>         | Vacant residential houses are houses currently vacant but the building has not been torn down yet. It may be under demolition or lack of maintenance.                                                           | distance to vacant house                | vacant building | < 2 meters           | 2 - 5 meters   | > 5 meters            |
| <b>industrial pollution</b>        | Industrial lots may have some negative impacts on children's play environment, like noise and air pollution                                                                                                     | distance to industrial land             | industrial lot  | < 5 meters           | 5-10 meters    | > 10 meters           |
